# Supplementary material for: Best Match: New relevance search for PubMed
Source: PubMed Central journal article supplement (PMC6112631; doi:10.1371/journal.pbio.2005343), 2018-08-28
Supplement: pbio.2005343.s001.pdf [file pbio.2005343.s001.pdf]

# S1 Glossary

## List of abbreviations and definitions

**A/B testing** A method to compare two or more variants (A and B), that are identical except for one variation being tested. This intuition behind this approach is similar to case-control studies in biomedicine.

**Best Match** The name of the new relevance sort option used in PubMed and described in this article.

**BM25** Also referred to as Okapi BM25, is a classic probabilistic term weighting model for document ranking. It is defined in S1 Text and used as the first-step ranking function in our overall method.

**CTR** Short for Click Through Rate, a metric for the rate at which a specific online presentation (e.g. a web advertisement) is clicked. It is detailed in S5 Text.

**Field** A document field is a part of a PubMed record, e.g. title, abstract or author names.

**Gold Standard** A set of training examples, considered as ground truth required for training machine learning models.

**Held-out test data** An important method for ensuring that the metrics for a model do not reflect over-fitting on training data is to have a hold-out set for testing, consisting of data that was not used during training.

**IR** Short for information retrieval: finding information matching a user need. In this article, it refers to retrieving PubMed articles relevant to a user query.

**L2R** Short for Learning-to-rank, a class of machine learning methods that focuses on optimally ranking a set of items. In this work, L2R is used for document ranking.

**LambdaMART** A highly effective and efficient learning-to-rank algorithm we applied for re-ranking results in the second step of our overall method, detailed in S2 Text.

**Machine Learning** A field of computer science focusing on teaching computers to learn from training data without explicit rule programming.

**NDCG** Short for Normalized Discounted Cumulative Gain, a standard metric to evaluate ranked lists against a gold standard, detailed in S5 Text.

**TF-IDF** A traditional method to measure the relative importance of a query term to a given document in the entire document collection based on two factors (a) **TF**: term frequency - how often a query term occurs in a given document and (b) **IDF**: inverse document frequency - whether the term is rare or common across all documents). It is defined in S1 Text.
