# Supplementary material for: Best Match: New relevance search for PubMed
Source: PubMed Central journal article supplement (PMC6112631; doi:10.1371/journal.pbio.2005343), 2018-08-28
Supplement: pbio.2005343.s002.pdf [file pbio.2005343.s002.pdf]

## S1 Text

### First stage ranking by BM25

BM25 with extension to multiple weighted Fields (BM25F) [1] is a frequentist scoring function. As mentioned before, each document in PubMed consists of a set of data fields (i.e. title, abstract, etc.) and within each field there is a bag of words or phrases — or MeSH concepts identifiers for the MeSH field. During indexing, the term frequencies of all words within document fields are collected and stored. During retrieval, these frequencies are used to calculate a prior score for PubMed documents matching the terms in the user’s query. The prior relevance of a document to a single term query depends on the following:

- $tf(t)$ : the local weight of a term  $t$ , or term frequency. It is the sum of its frequencies over all the fields of a document, weighted by the respective field weights  $w$  and averaged over lengths  $l$ .

$$tf(t) = \sum_{f \in fields} \frac{occ(t, f) \times w(f)}{l(f)}, \quad (1)$$

where  $occ(t, f)$  is the count of  $t$  in the field  $f$ .

- $idf(t)$ : the global weight of a term  $t$ , or inverse document frequency. It is:

$$idf(t) = 1 + \ln \left( \frac{N}{n(t) + 1} \right), \quad (2)$$

where  $N$  is the total number of documents and  $n(t)$  is the size (count) of its subset of documents containing the term  $t$ .

- $w(f)$ : the weight of a field  $f$ . This weight allows one to give more importance to a certain information stream, e.g. currently, matches in the title and MeSH fields are multiplied by a weight of 5 while other field are not weighted.
- $l(f)$ : the length of a field  $f$ . The sum of all field lengths of a document is the document length.

The computation of BM25F requires combining field lengths and weights into a document length  $dl$  and its average in the corpus:

$$dl = \sum_{f \in fields} l(f) \times w(f), \quad (3)$$

$$avg(dl) = \text{average of } dl \text{ across all documents.} \quad (4)$$

Then, the prior relevance score associated with a document  $d$  for a query  $q$  is defined as

$$BM25F(d, q) = \sum_{t \in q \cap d} \frac{tf(t)}{k_1 \left( (1 - b) + b \frac{dl}{avg(dl)} \right) + tf(t)} \times idf(t) \quad (5)$$

where  $k_1$  and  $b$  are hyper parameters empirically set to 1.2 and 0.75 respectively, in PubMed. We also experimented with divergence from randomness (DfR) [2] for the first stage ranking and combining DfR with BM25. No improvement was observed and the results can be found at our GitHub repository.

## References

- [1] S. Robertson and H. Zaragoza. The probabilistic relevance framework: BM25 and beyond. *Found. Trends Inf. Retr.*, 3(4):333–389, 2009.
- [2] G. Amati, and C.J. Van Rijsbergen. Probabilistic models of information retrieval based on measuring the divergence from randomness. *ACM Transactions on Information Systems (TOIS)*, 20(4):357–389, 2002.
